# Supplementary material for: Anti-counterfeiting patterns encrypted with multi-mode luminescent nanotaggants
Source: Royal Society of Chemistry journal article supplement (doi:10.1039/c6nr09083d), 2017-01-01
Supplement: c6nr09083d1.pdf [file c6nr09083d1.pdf]

Electronic Supplementary Information

# Anti-counterfeiting Patterns Encrypted with Multi-Mode Luminescent Nanotaggants

*Tianying Sun,<sup>a</sup> Bingzhe Xu,<sup>b</sup> Bing Chen,<sup>a</sup> Xian Chen,<sup>a</sup> Mingyu Li,<sup>\*,c</sup> Peng Shi,<sup>\*,b</sup> and Feng Wang<sup>\*,a,d</sup>*

<sup>a</sup>Department of Physics and Materials Science City University of Hong Kong, 83 Tat Chee Avenue, Hong Kong SAR, China. E-mail: [fwang24@cityu.edu.hk](mailto:fwang24@cityu.edu.hk)

<sup>b</sup>Department of Medical and Biomedical Engineering, City University of Hong Kong, 83 Tat Chee Avenue, Hong Kong SAR, China. E-mail: [pengshi@cityu.edu.hk](mailto:pengshi@cityu.edu.hk)

<sup>c</sup>State Key Laboratory of Modern Optical Instrumentation, Zhejiang University, Hangzhou 310027, China. E-mail: [limy@zju.edu.cn](mailto:limy@zju.edu.cn)

<sup>d</sup>City University of Hong Kong Shenzhen Research Institute, Shenzhen 518057, China.

**Reagent:**

Gd(CH<sub>3</sub>CO<sub>2</sub>)<sub>3</sub>·xH<sub>2</sub>O, (99.9%), Y(CH<sub>3</sub>CO<sub>2</sub>)<sub>3</sub>·xH<sub>2</sub>O, (99.9%), Yb(CH<sub>3</sub>CO<sub>2</sub>)<sub>3</sub>·xH<sub>2</sub>O, (99.9%), Nd(CH<sub>3</sub>CO<sub>2</sub>)<sub>3</sub>·xH<sub>2</sub>O, (99.9%), Er(CH<sub>3</sub>CO<sub>2</sub>)<sub>3</sub>·xH<sub>2</sub>O, (99.9%), Tm(CH<sub>3</sub>CO<sub>2</sub>)<sub>3</sub>·xH<sub>2</sub>O, (99.9%), Ce(CH<sub>3</sub>CO<sub>2</sub>)<sub>3</sub>·xH<sub>2</sub>O, (99.9%), Tb(CH<sub>3</sub>CO<sub>2</sub>)<sub>3</sub>·xH<sub>2</sub>O, (99.9%), Eu(CH<sub>3</sub>CO<sub>2</sub>)<sub>3</sub>·xH<sub>2</sub>O, (99.9%), NaOH, (>98%), NH<sub>4</sub>F, (>98%), 1-octadecene (90%), oleic acid (90%), were all purchased from Sigma-Aldrich. Absolute ethanol (99.85%), methyl alcohol (99.99%), and cyclohexane (99.9%) were purchased from VWR International. Photoresist SU-8 was purchased from MicroChem. All reagents were used as received without further purification.

**Synthesis of lanthanide-doped nanoparticles:**

The lanthanide-doped nanoparticle was synthesized by following our previous coprecipitation protocols. In general, lanthanide acetates in water solution was added to a binary solvent mixture of OA and ODE in a 50 mL flask. The mixture was heated at 150°C for 50 min to form the lanthanide-oleate precursor solution before cooling down to 45°C. Thereafter, an appropriate amount of methanol solution containing NH<sub>4</sub>F and NaOH was added, and the resultant solution was stirred for 90 min. After the methanol was evaporated, the solution was heated to 290°C under argon atmosphere for 1 h and then cooled down to room temperature. The resulting nanoparticles were precipitated by addition of ethanol, collected by centrifugation at 6000 rpm for 3 min, washed with ethanol for several times, and redispersed in cyclohexane. The core-shell nanoparticles were synthesized by a layer-by-layer growth process using preformed nanoparticles as seeds.

**Preparation of anti-counterfeiting patterns by photolithography:** The as-prepared nanotagants were mixed with SU-8 photoresist at 25 wt% to form a uniform nanotagant/SU-8

composite, followed by a standard photolithography procedure using a Hybralign series 500 mask alignment and exposure system. The patterning procedure can be described as spinning, soft-baking, exposure, post-exposure bake, developing and rinsing.

**Preparation of anti-counterfeiting patterns by contact printing:**

Two stamps with pre-designed symbols were fabricated by Trodat, Inc. One stamp is a circlet and another one is an equilateral cross. Combining those two would give a complete sun cross symbol. Two types of aqueous dispersion nanoparticle ink were injected into the ink cartridge of the stamps, respectively before being imprinted onto a white copy paper. The aqueous dispersions of nanoparticles were prepared by removing the oleate ligands through acidic treatment.<sup>[1]</sup>

**Characterizations:** XRD patterns were recorded on a Bruker AXS D2 phaser with a graphite-monochromatized Cu K $\alpha$  radiation (1.5406 Å). TEM measurements were carried out on a JEOL-JEM 2100F transmission electron microscope operating at an acceleration voltage of 200 kV. SEM images were obtained with a Hitachi S-4800 field emission scanning electron microscope. Emission spectra were recorded with F-4600 spectrophotometer (Hitachi). Optical micrographs of patterns were recorded using an advanced research microscope (ECLIPSE Ni-U, Nikon) equipped with a streak camera (DS-Ri2, Nikon). Luminescence photos were taken with an Apple iPad through a 650 nm shortpass filter. All measurements were performed at room temperature.

**Table S1.** Synthetic conditions for core-shell nanoparticles of different structures and compositions.

| Nanoparticle                                                                                                                                          | core                    | 1 <sup>st</sup> shell   | 2 <sup>nd</sup> shell   | 3 <sup>rd</sup> shell  | 4 <sup>th</sup> shell  |
|-------------------------------------------------------------------------------------------------------------------------------------------------------|-------------------------|-------------------------|-------------------------|------------------------|------------------------|
| NaYF <sub>4</sub><br>@NaYbF <sub>4</sub> :Er(2%)<br>@NaYF <sub>4</sub>                                                                                | OA:ODE=3:7<br>F:RE=3.95 | OA:ODE=3:7<br>F:RE=3.95 | OA:ODE=3:7<br>F:RE=3.95 | ---                    | ---                    |
| NaYF <sub>4</sub> :Yb/Tm(39%/1%)<br>@NaYF <sub>4</sub> :Yb/Nd(30%/15%)<br>@NaYF <sub>4</sub>                                                          | OA:ODE=3:7<br>F:RE=3.95 | OA:ODE=3:7<br>F:RE=3.95 | OA:ODE=3:7<br>F:RE=3.95 | ---                    | ---                    |
| NaGdF <sub>4</sub> :Ce/Tb(15%/5%)                                                                                                                     | OA:ODE=4:6<br>F:RE=3.1  | ---                     | ---                     | ---                    | ---                    |
| NaYF <sub>4</sub> :Yb/Er(38%/2%)<br>@NaYF <sub>4</sub>                                                                                                | OA:ODE=3:7<br>F:RE=3.95 | OA:ODE=3:7<br>F:RE=3.95 | ---                     | ---                    | ---                    |
| NaGdF <sub>4</sub> :Yb/Nd(30%/30%)<br>@NaGdF <sub>4</sub> :Yb/Er(38%/2%)<br>@NaGdF <sub>4</sub>                                                       | OA:ODE=4:6<br>F:RE=3.2  | OA:ODE=4:6<br>F:RE=3.2  | OA:ODE=4:6<br>F:RE=3.2  | ---                    | ---                    |
| NaGdF <sub>4</sub> :Ce(15%)<br>@NaGdF <sub>4</sub> :Eu(5%)                                                                                            | OA:ODE=4:6<br>F:RE=3.1  | OA:ODE=4:6<br>F:RE=3.1  | ---                     | ---                    | ---                    |
| NaGdF <sub>4</sub> :Yb/Tm(49%/1%)<br>@NaGdF <sub>4</sub>                                                                                              | OA:ODE=4:6<br>F:RE=3.3  | OA:ODE=4:6<br>F:RE=3.3  | ---                     | ---                    | ---                    |
| NaGdF <sub>4</sub> :Yb/Tm(49%/1%)<br>@NaGdF <sub>4</sub><br>@NaYbF <sub>4</sub> :Nd(50%)<br>@NaGdF <sub>4</sub> :Yb/Er(38%/2%)<br>@NaGdF <sub>4</sub> | OA:ODE=4:6<br>F:RE=3.3  | OA:ODE=4:6<br>F:RE=3.3  | OA:ODE=4:6<br>F:RE=3.3  | OA:ODE=4:6<br>F:RE=3.3 | OA:ODE=4:6<br>F:RE=3.3 |
| NaYF <sub>4</sub><br>@NaYbF <sub>4</sub> :Tm(1%)<br>@NaYF <sub>4</sub>                                                                                | OA:ODE=3:7<br>F:RE=3.95 | OA:ODE=3:7<br>F:RE=3.95 | OA:ODE=3:7<br>F:RE=3.95 | ---                    | ---                    |
| NaYF <sub>4</sub> :Yb/Er(38%/2%)<br>@NaYbF <sub>4</sub> :Nd(50%)<br>@NaYF <sub>4</sub>                                                                | OA:ODE=3:7<br>F:RE=3.95 | OA:ODE=3:7<br>F:RE=3.95 | OA:ODE=3:7<br>F:RE=3.95 | ---                    | ---                    |

OA, oleic acid; ODE, 1-octadecene; F, fluoride; RE, rare-earth ions.

**Table S2.** The composition of nanotaggants for each set of pattern in Fig. 3.

| # | Composition of nanoparticles                                                                                                                                                                                          |
|---|-----------------------------------------------------------------------------------------------------------------------------------------------------------------------------------------------------------------------|
| 1 | NaYF <sub>4</sub> :Yb/Er(38%/2%)@NaYF <sub>4</sub><br>NaYF <sub>4</sub> :Yb/Tm(39%/1%)@NaYF <sub>4</sub> :Yb/Nd(30%/15%)@NaYF <sub>4</sub><br>NaGdF <sub>4</sub> :Ce/Tb(15%/5%)                                       |
| 2 | NaYF <sub>4</sub> @NaYbF <sub>4</sub> : Er(2%)@NaYF <sub>4</sub><br>NaGdF <sub>4</sub> :Yb/Nd(30%/30%)@NaGdF <sub>4</sub> :Yb/Er(38%/2%)@NaGdF <sub>4</sub><br>NaGdF <sub>4</sub> :Ce(15%)@NaGdF <sub>4</sub> :Eu(5%) |
| 3 | NaGdF <sub>4</sub> :Yb/Tm(49%/1%)@NaGdF <sub>4</sub><br>NaGdF <sub>4</sub> :Yb/Nd(30%/30%)@NaGdF <sub>4</sub> :Yb/Er(38%/2%)@NaGdF <sub>4</sub><br>NaGdF <sub>4</sub> : Ce/Tb(15%/5%)                                 |
| 4 | NaYF <sub>4</sub> @NaYbF <sub>4</sub> :Er(2%)@NaYF <sub>4</sub><br>NaGdF <sub>4</sub> :Yb/Nd(30%/30%)@NaGdF <sub>4</sub> :Yb/Er(38%/2%)@NaGdF <sub>4</sub><br>NaGdF <sub>4</sub> :Ce/Tb(15%/5%)                       |
| 5 | NaGdF <sub>4</sub> :Yb/Tm(49%/1%)@NaGdF <sub>4</sub><br>NaGdF <sub>4</sub> :Yb/Nd(30%/30%)@NaGdF <sub>4</sub> :Yb/Er(38%/2%)@NaGdF <sub>4</sub><br>NaGdF <sub>4</sub> :Ce(15%)@NaGdF <sub>4</sub> :Eu(5%)             |

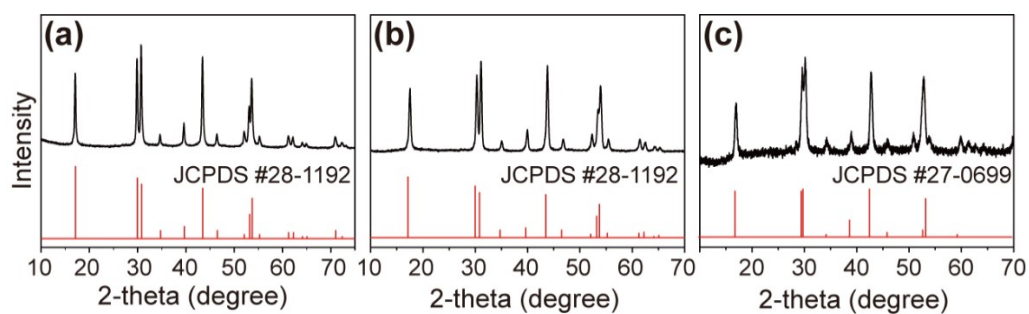

**Fig. S1** XRD patterns of (a)  $\text{NaYF}_4@\text{NaYbF}_4:\text{Er}@\text{NaYF}_4$ , (b)  $\text{NaYF}_4:\text{Yb/Tm}@\text{NaYF}_4:\text{Yb/Nd}@\text{NaYF}_4$ , and (c)  $\text{NaGdF}_4:\text{Ce/Tb}$  nanoparticles. The line spectra are literature data for hexagonal-phase  $\text{NaYF}_4$  (a and b) and hexagonal-phase  $\text{NaGdF}_4$  (c).

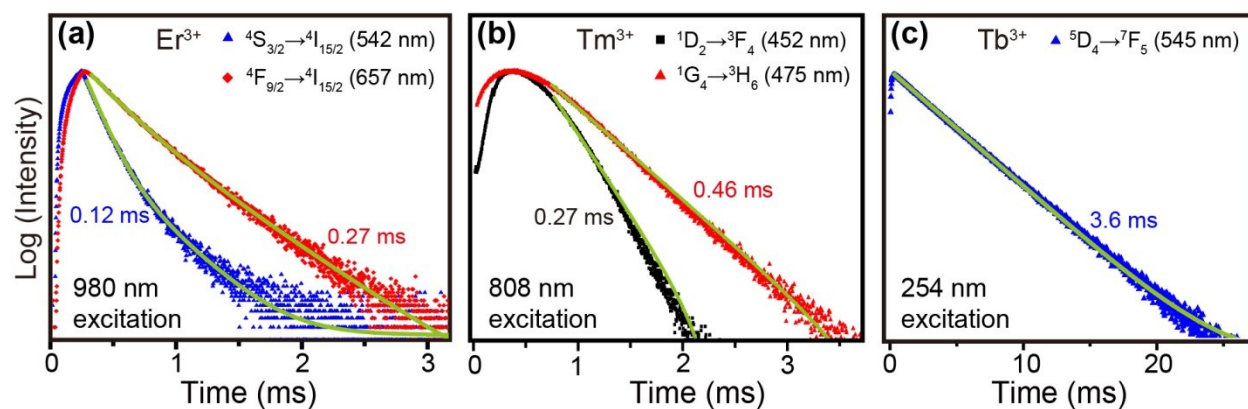

**Fig. S2** Luminescent decay curves of (a) NaYF<sub>4</sub>@NaYbF<sub>4</sub>:Er@NaYF<sub>4</sub>, (b) NaYF<sub>4</sub>:Yb/Tm@NaYF<sub>4</sub>:Yb/Nd@NaYF<sub>4</sub>, and (c) NaGdF<sub>4</sub>:Ce/Tb nanoparticles under excitation at 980 nm, 808 nm, and 254 nm, respectively. Quantum yields of the samples are 0.5%, 0.1% and 90%, respectively.

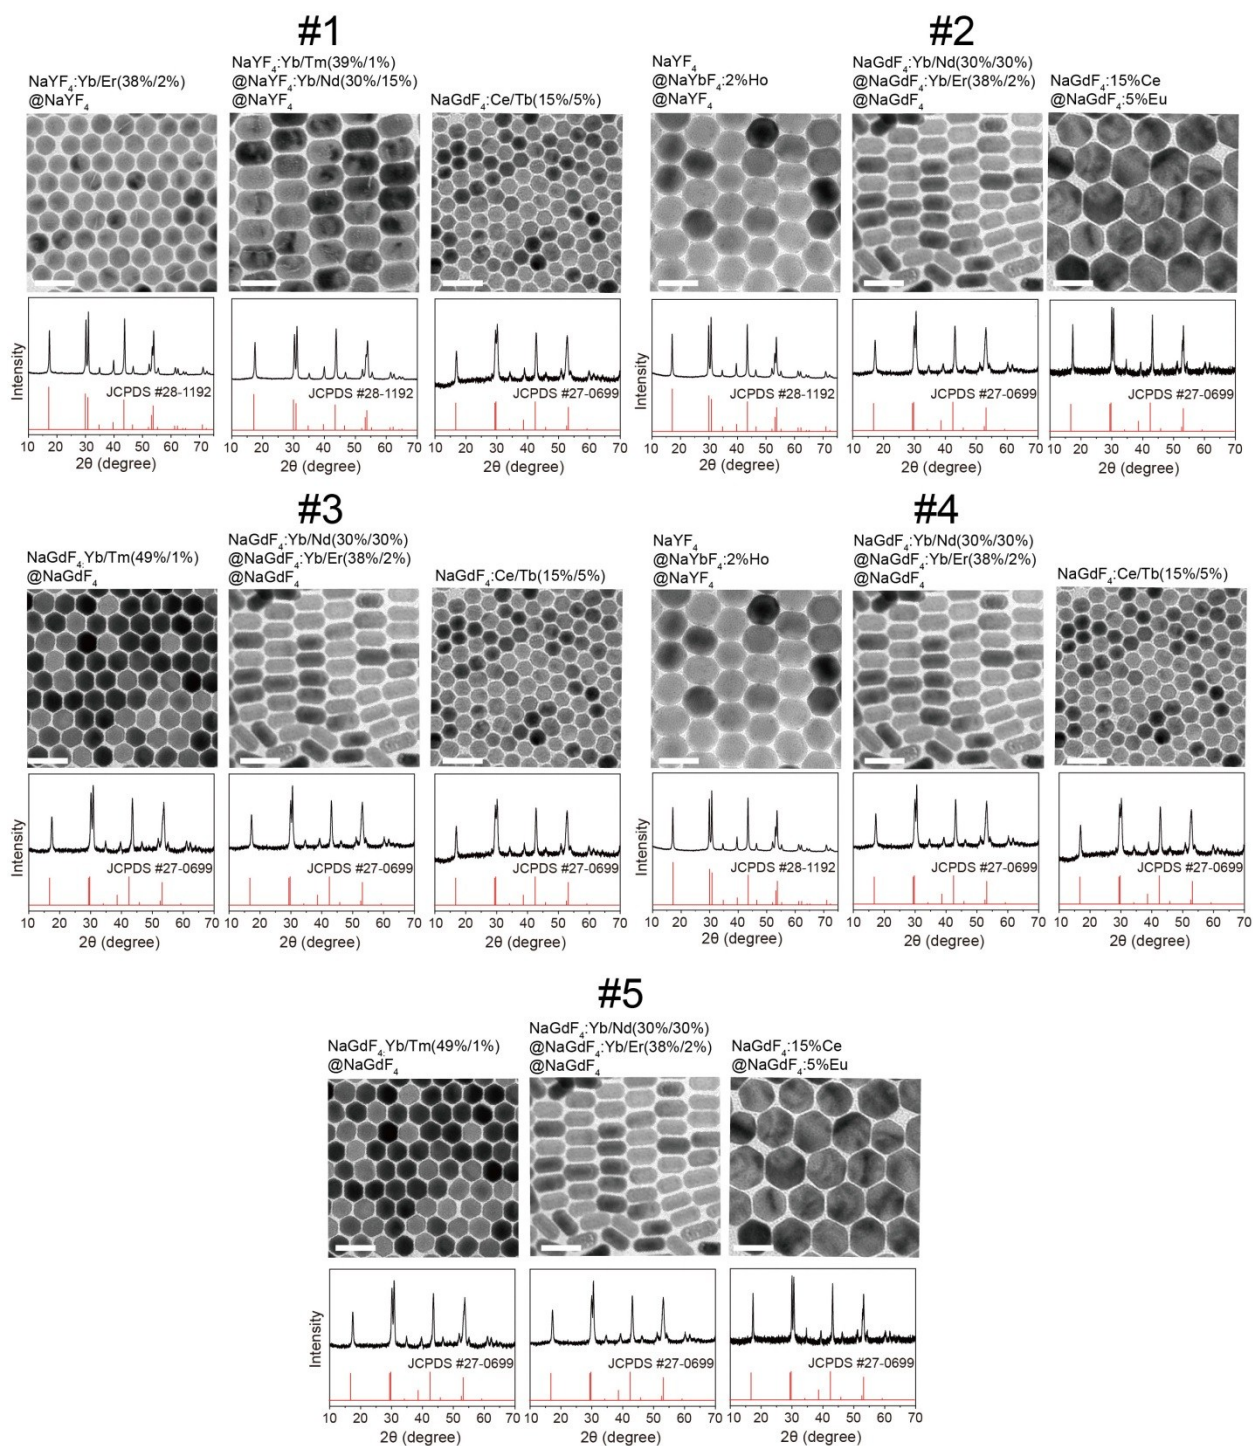

**Fig. S3** TEM images and XRD patterns of the nanotaggants in Fig. 3. Scale bars for TEM images are 50 nm. The line spectra are the literature data for hexagonal-phase NaYF<sub>4</sub> (JCPDS #28-1192) and hexagonal-phase NaGdF<sub>4</sub> (JCPDS #27-0699).



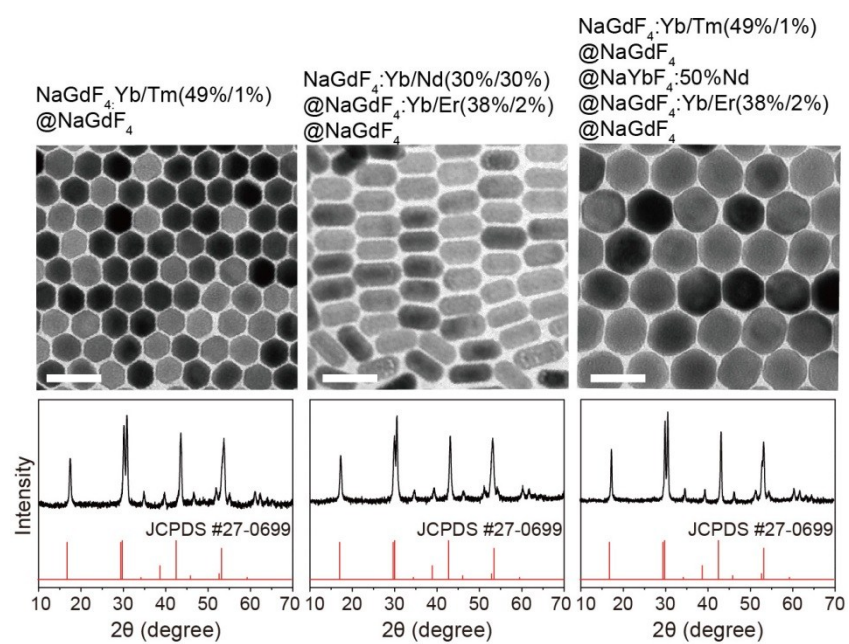

**Fig. S4** TEM images and XRD patterns of the nanotagants in Fig. 4. Scale bars for TEM images are 50 nm. The line spectra are the literature data for hexagonal-phase  $\text{NaGdF}_4$ .

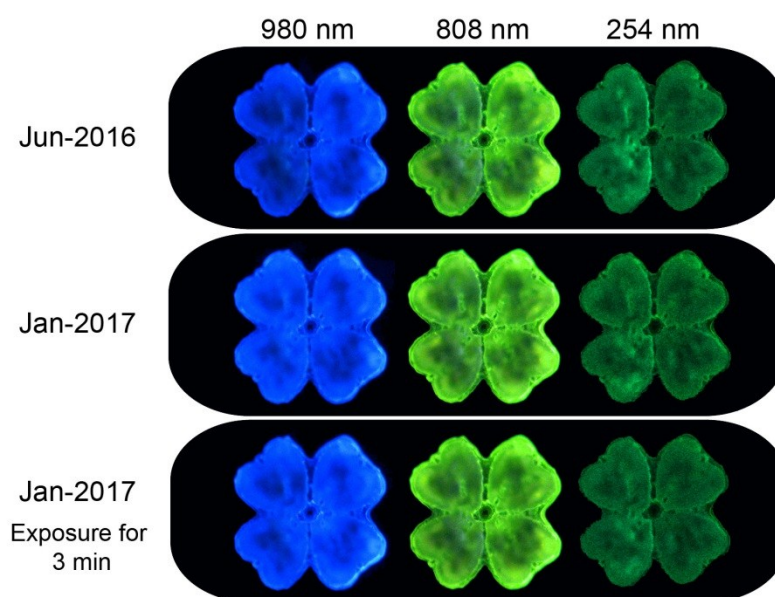

**Fig. S5** Evaluation of chemical and optical stability of a pattern. No signs of chemical degradation or photobleaching are observed after the pattern is stored for six months and exposed to laser irradiation for three minutes.

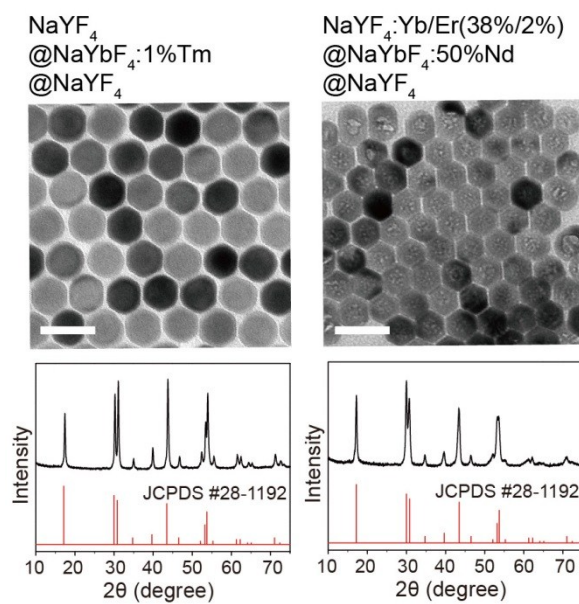

**Fig. S6** TEM images and XRD patterns of the nanotaggants in Fig. 5. Scale bars for TEM images are 50 nm. The line spectra are the literature data for hexagonal-phase NaYF<sub>4</sub>.

#### Reference for Supporting Information

- 1 N. Bogdan, F. Vetrone, G. A. Ozin, J. A. Capobianco, *Nano. Lett.*, 2011, **11**, 835.
